# Supplementary material
Source: publisher figshare collection journal article supplement (https://frontiersin.figshare.com/ndownloader/files/21295803)
Supplement: Supplementary file [file 21295803]

**A**

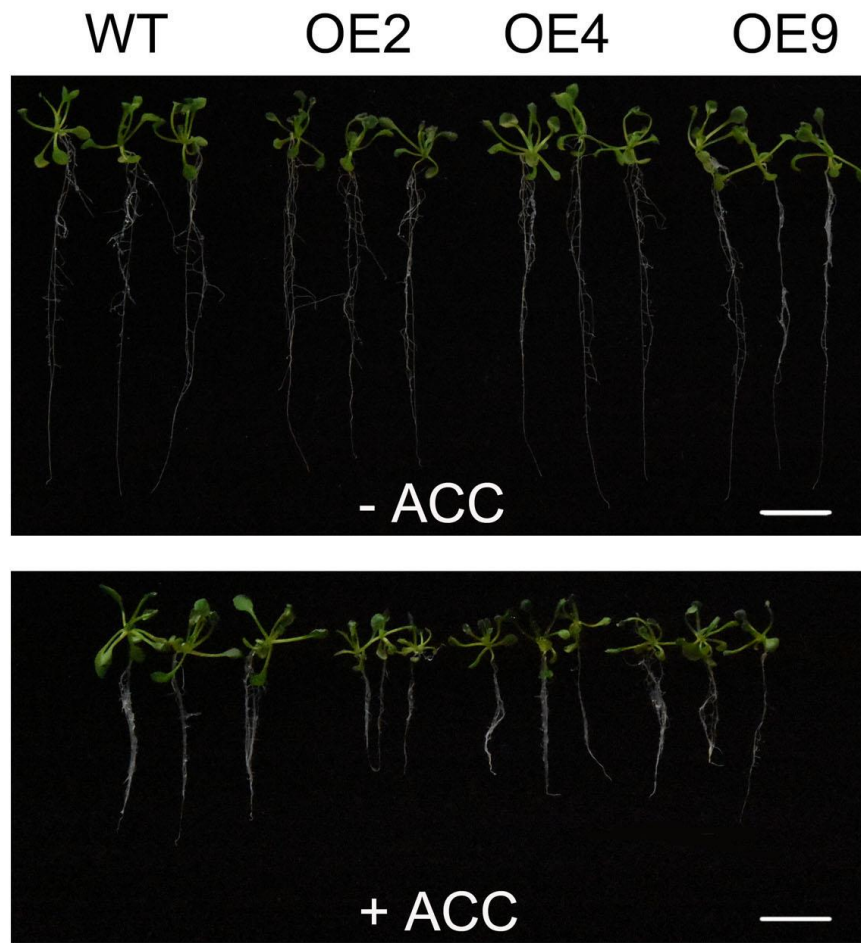

**B**

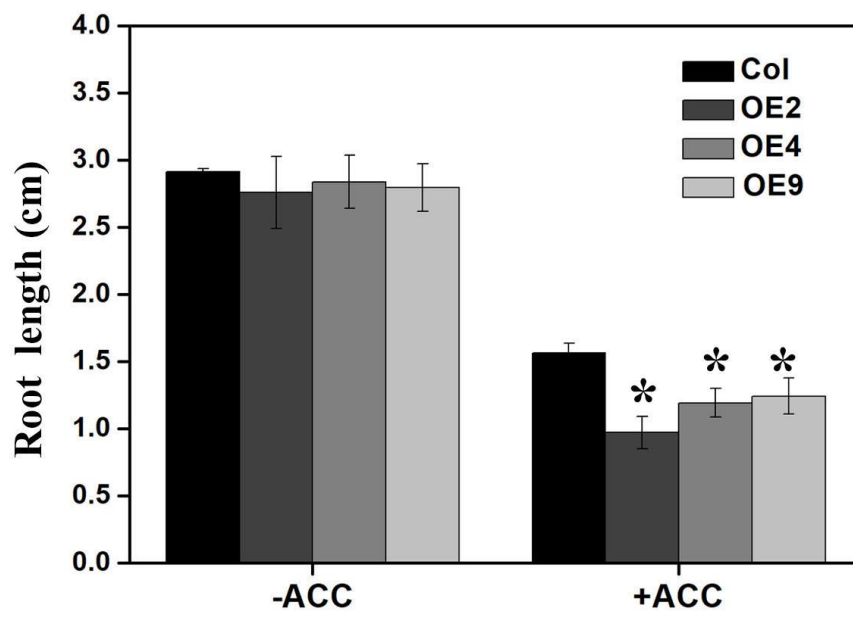

**FIGURE S1. Phenotypic characterization of wild-type (WT) and GhEIL1-OE (over-expressing) *Arabidopsis* plants.** (A) The phenotype of WT and three different homozygous GhEIL1-OE lines with or without ACC treatments. (B) Root length of WT and GhEIL1-OE lines with or without ACC treatments. The seedlings were planted and grown in MS-medium with or without 10  $\mu$ M ACC for 16 days then observed and measured. Scale bar = 1 cm. Each value is the mean  $\pm$  SE, n = 30. The significant differences were evaluated by Tukey' HSD test: \*p < 0.05.

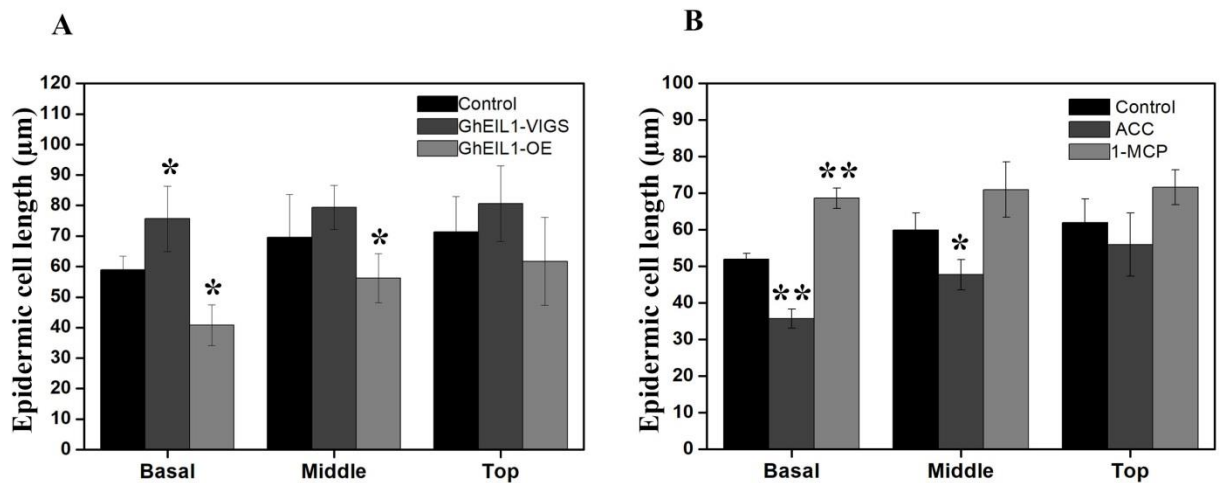

**FIGURE S2. Measurement of cell length in the petals after transient transformation and the petals after hormone treatments.** (A) The cell length of controls, GhEIL1-VIGS and GhEIL1-OE petals in each region. (B) The cell length of petals in control, 100  $\mu$ M ACC and 100  $\mu$ M 1-MCP treatments in each region. Three biological replicates were analyzed for each measurement. All values indicate means  $\pm$  SD. Asterisks indicate a significant difference: \*p < 0.05, \*\*p < 0.01, n > 50.

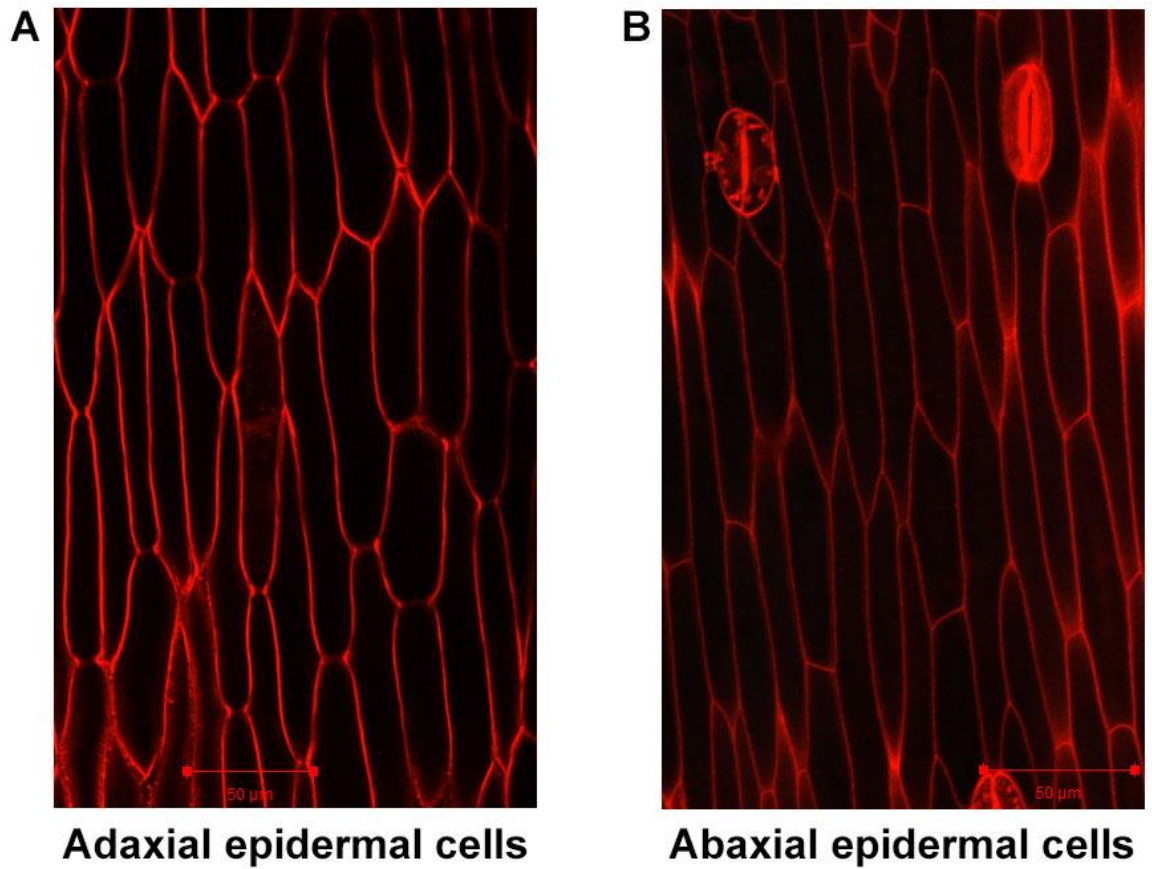

**FIGURE S3. Morphological characterization of petal cells.** (A) The adaxial epidermal cells in petal. (B) The abaxial epidermal cells in petal. Scale bar represents 50 µm.

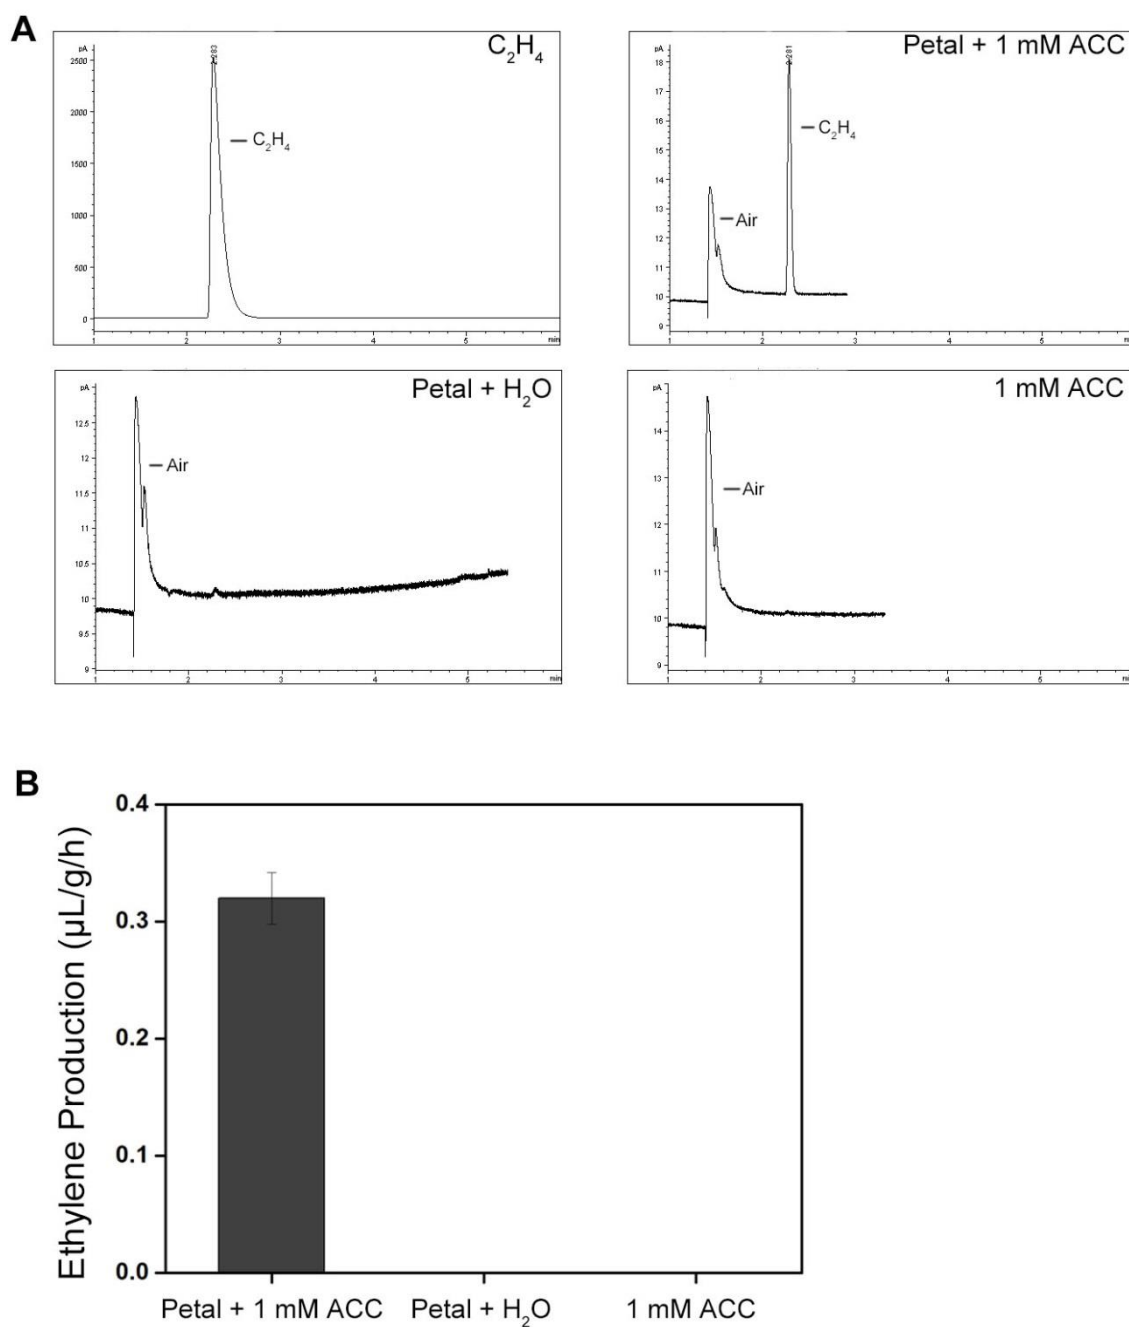

**FIGURE S4. Measurement of ethylene content. (A)** GC profiles of the gas compounds from different treatments after incubated at 30°C for 1 hour. The petals used here were in stage 3, which were used for hormone treatments. **(B)** The ethylene production in different treatments. The value indicates means  $\pm$  SD.

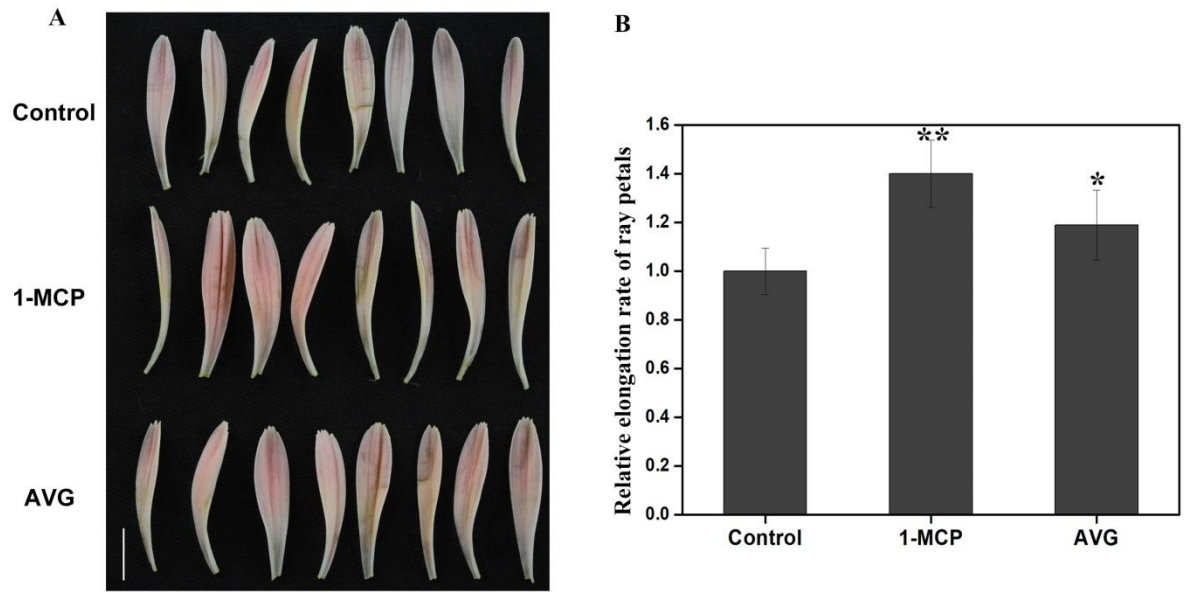

**FIGURE S5. The effects of AVG and 1-MCP on petal growth in *G. hybrida*. (A)**

The phenotypes of petals treated with deionized water (control), AVG and 1-MCP for 7 days. **(B)** The relative elongation rate of ray petals after 7 days treatments. Scale bar represents 1 cm. All values indicate means  $\pm$  SD. Asterisks indicate a significant difference: \* $p < 0.05$ , \*\* $p < 0.01$ .
